# Supplementary material for: High FSH dosing is associated with reduced live birth rate in fresh but not subsequent frozen embryo transfers
Source: Oxford University Press journal article supplement (doi:10.1093/humrep/dex094), 2017-04-20
Supplement: dex094_suppl_table1.pdf [file dex094_suppl_table1.pdf]

**Supplemental Table S1** Adjusted odds of live birth by total gonadotropin dose.

| Total gonadotropin dose<br>(versus $\leq 2100$ units) | OR (95% CI)      | P     |
|-------------------------------------------------------|------------------|-------|
| Fresh ET cycles                                       |                  |       |
| 2101–2999 units                                       | 0.88 (0.56–1.36) | >0.99 |
| $\geq 3000$ units                                     | 0.72 (0.46–1.13) | 0.277 |
| FET cycles                                            |                  |       |
| 2101–2999 units                                       | 0.91 (0.62–1.33) | >0.99 |
| $\geq 3000$ units                                     | 1.05 (0.71–1.56) | >0.99 |
