# Supplementary material for: High FSH dosing is associated with reduced live birth rate in fresh but not subsequent frozen embryo transfers
Source: Oxford University Press journal article supplement (doi:10.1093/humrep/dex094), 2017-04-20
Supplement: dex094_suppl_table2.pdf [file dex094_suppl_table2.pdf]

**Supplemental Table SII** Adjusted odds of live birth from fresh embryo transfer as compared to subsequent paired frozen embryo transfer by total gonadotropin dose.

| <b>Gonadotropin dose</b>                             | <b>OR (95% CI)</b> | <b>P</b> |
|------------------------------------------------------|--------------------|----------|
| Fresh embryo transfer (compared with subsequent FET) |                    |          |
| ≤2100 units                                          | 0.95 (0.66–1.37)   | >0.99    |
| 2101–2999 units                                      | 0.91 (0.62–1.33)   | >0.99    |
| ≥3000 units                                          | 0.65 (0.43–0.96)   | 0.028    |
